# Supplementary material
Source: publisher figshare collection journal article supplement (https://acs.figshare.com/ndownloader/files/17388179)

**A Cellular Component**

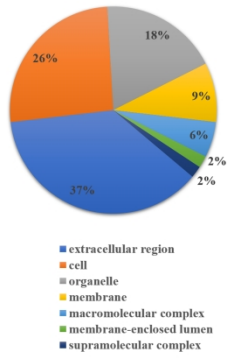

**B Molecular Function**

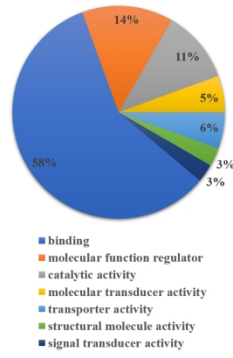

**C Biological Process**

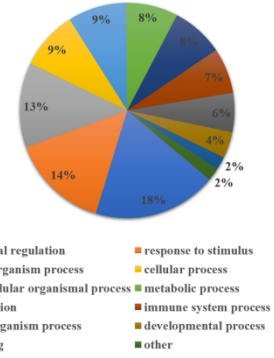

448x188mm (300 x 300 DPI)

Supplement: Supplementary file 1 [file 17388179]
